# Supplementary material for: Hepatocyte-Specific Phgdh-Deficient Mice Culminate in Mild Obesity, Insulin Resistance, and Enhanced Vulnerability to Protein Starvation
Source: MDPI journal article supplement (doi:10.3390/nu13103468), 2021-09-29

# **Hepatocyte-specific *Phgdh* deficient mice culminate in mild obesity, insulin resistance, and enhanced vulnerability to protein starvation**

Momoko Hamano, Kayoko Esaki, Kazuki Moriyasu, Tokio Yasuda, Sinya Mori, Kosuke Tashiro, Yoshio Hirabayashi and Shigeki Furuya

# Supplementary Table S1

## Amino acid concentration in serum

| amino acid | concentration<br>(nmol/g weight tissue) |                 | ratio<br>(%: LKO/Floxed) | <i>p</i> -value |
|------------|-----------------------------------------|-----------------|--------------------------|-----------------|
|            | Floxed group                            | LKO group       |                          |                 |
| L-Asp      | 5.85 ± 1.63                             | 12.86 ± 3.53    | 219.8                    | 0.10            |
| L-Glu      | 108.96 ± 14.32                          | 110.55 ± 14.49  | 101.5                    | N.S.            |
| L-Ser      | 110.49 ± 17.05                          | 130.07 ± 18.16  | 117.7                    | N.S.            |
| L-Gln      | 540.12 ± 33.53                          | 537.25 ± 28.85  | 99.5                     | N.S.            |
| L-His      | 46.51 ± 5.63                            | 52.54 ± 5.73    | 113.0                    | N.S.            |
| L-Thr      | 178.11 ± 29.01                          | 154.8 ± 11.73   | 86.9                     | N.S.            |
| Gly        | 427.79 ± 33.71                          | 467.88 ± 30.95  | 109.4                    | N.S.            |
| L-Arg      | 199.08 ± 34.16                          | 197.74 ± 17.94  | 99.3                     | N.S.            |
| Tau        | 1187.01 ± 97.94                         | 1136.12 ± 59.17 | 95.7                     | N.S.            |
| GABA       | N.D.                                    | N.D.            |                          |                 |
| L-Ala      | 429.67 ± 56.47                          | 411 ± 34.81     | 95.7                     | N.S.            |
| L-Tyr      | 61.92 ± 14.38                           | 64.57 ± 12.54   | 104.3                    | N.S.            |
| L-Val      | 117.11 ± 18.51                          | 100.33 ± 19.92  | 85.7                     | N.S.            |
| L-Met      | 27.98 ± 7.52                            | 30.06 ± 7.05    | 107.4                    | N.S.            |
| L-Phe      | 94.58 ± 13.14                           | 89.65 ± 7.4     | 94.8                     | N.S.            |
| L-Ile      | 54.64 ± 10.92                           | 48.72 ± 4.54    | 89.2                     | N.S.            |
| L-Leu      | 418.25 ± 66.56                          | 393.54 ± 18.32  | 94.1                     | N.S.            |

# Supplementary Figure S1

Floxed

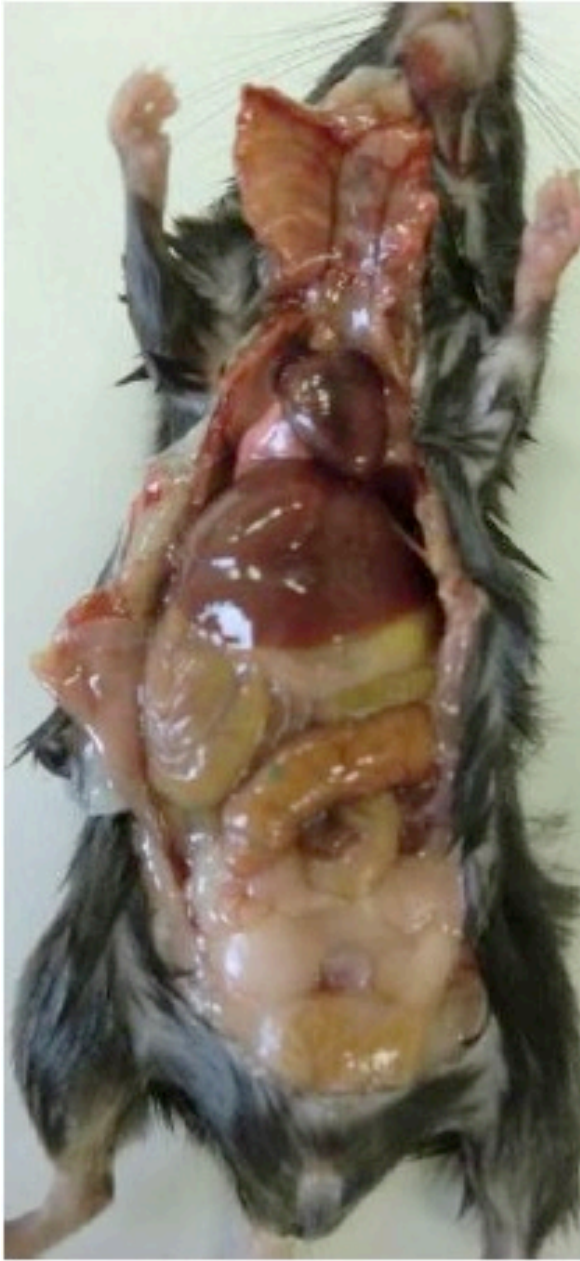

LKO

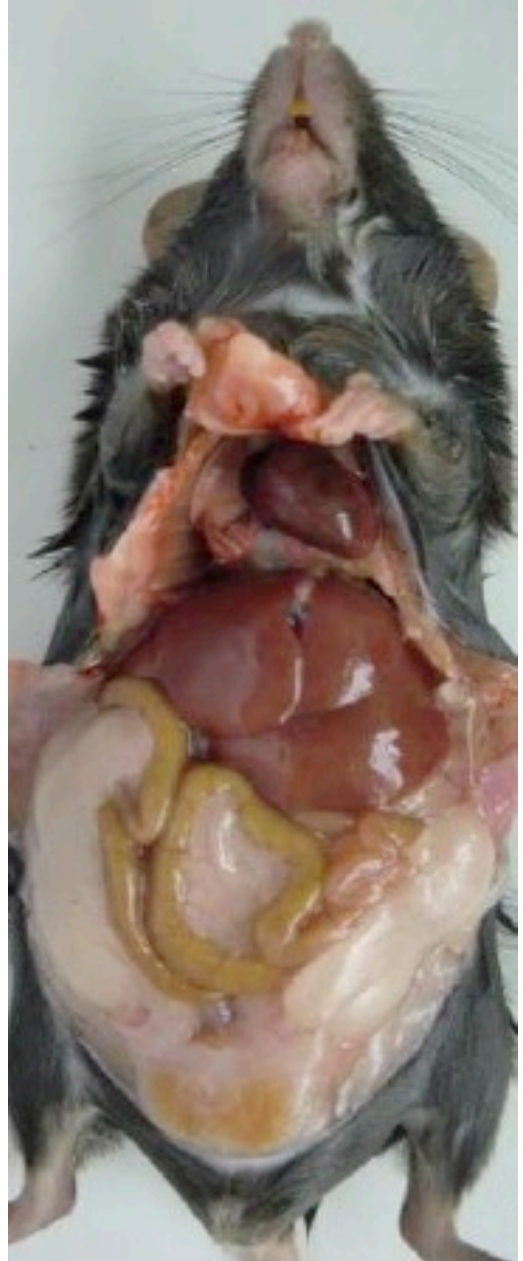

# Supplementary Figure S1

Floxed

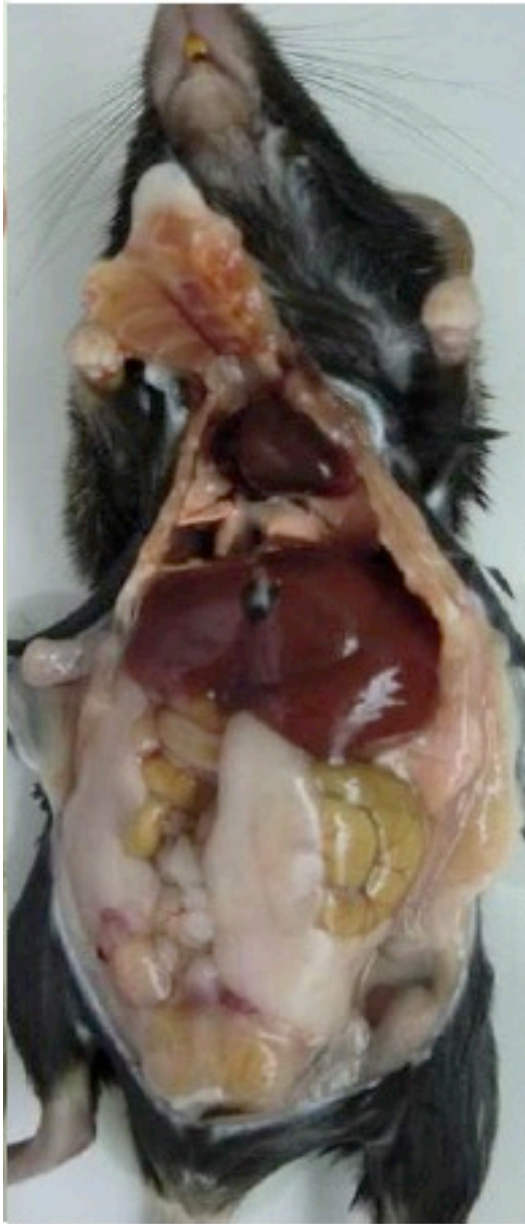

LKO

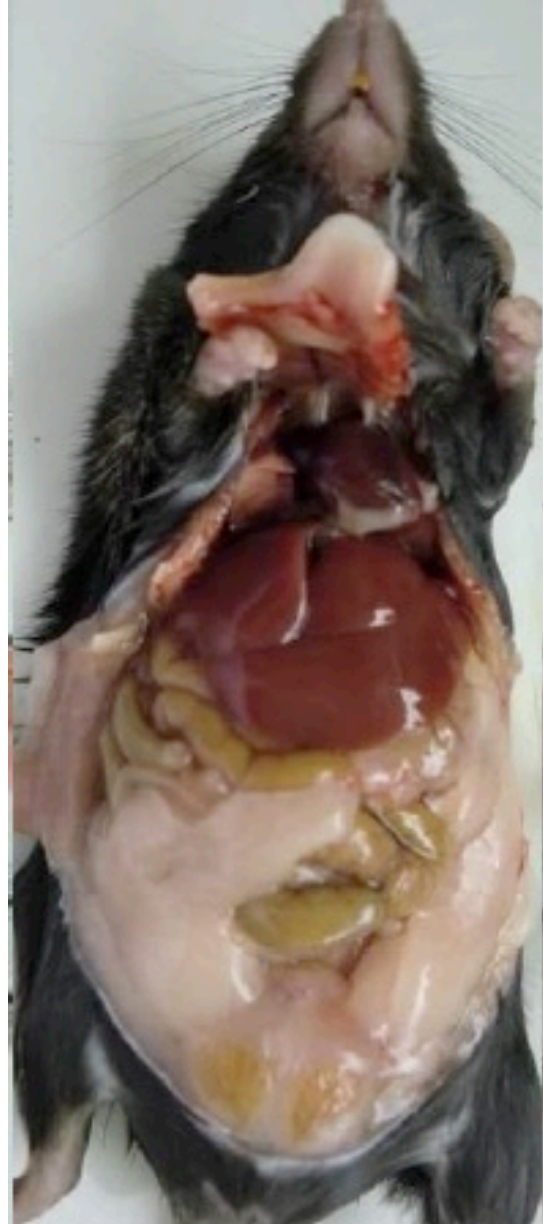

# Supplementary Figure S1

Floxed

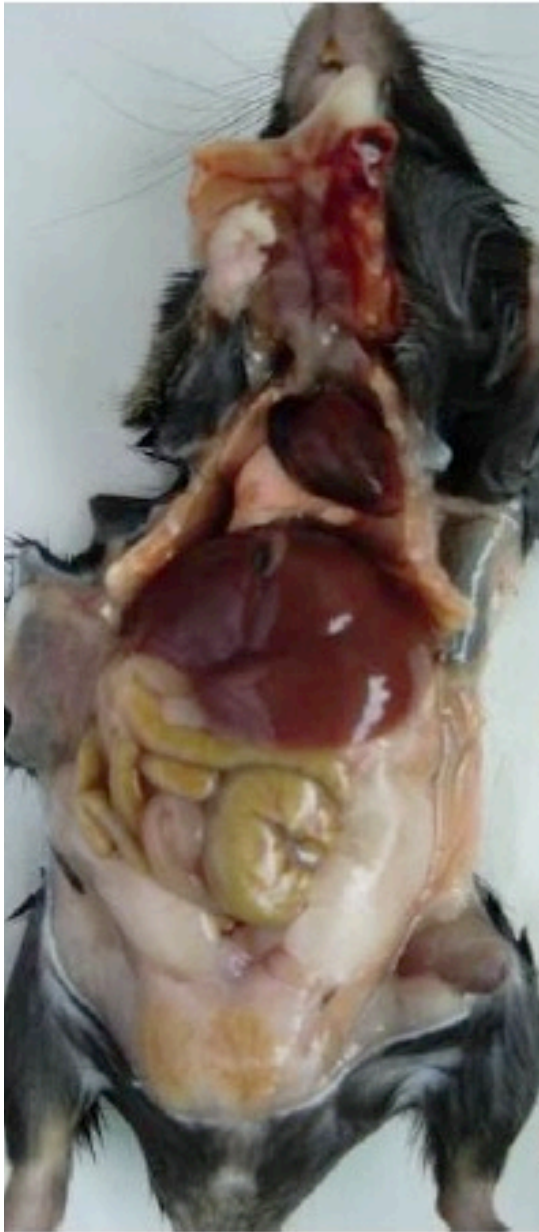

LKO

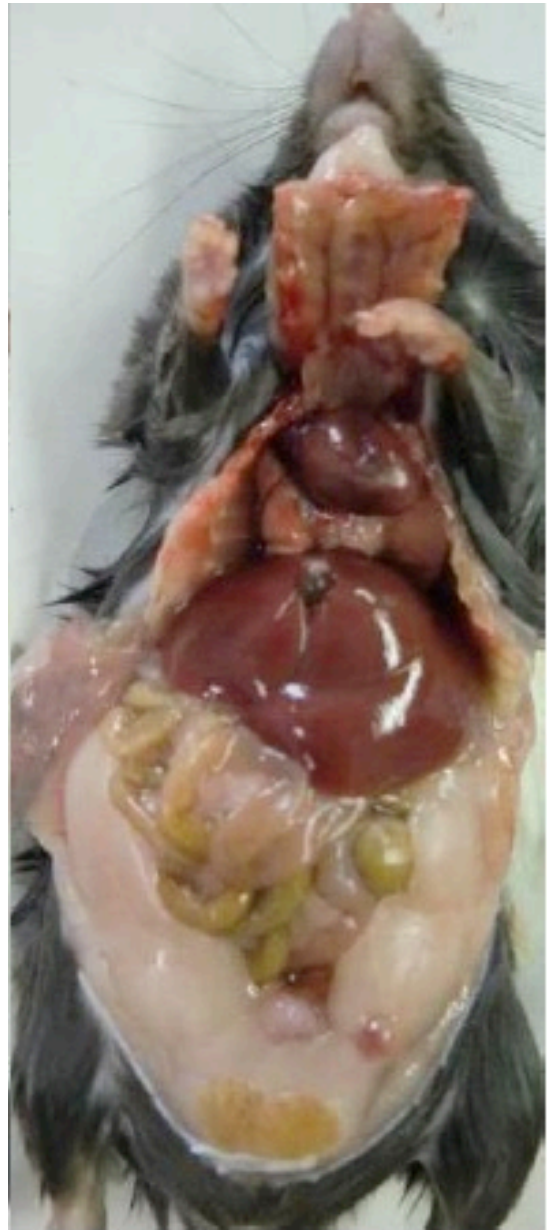

# Supplementary Figure S2

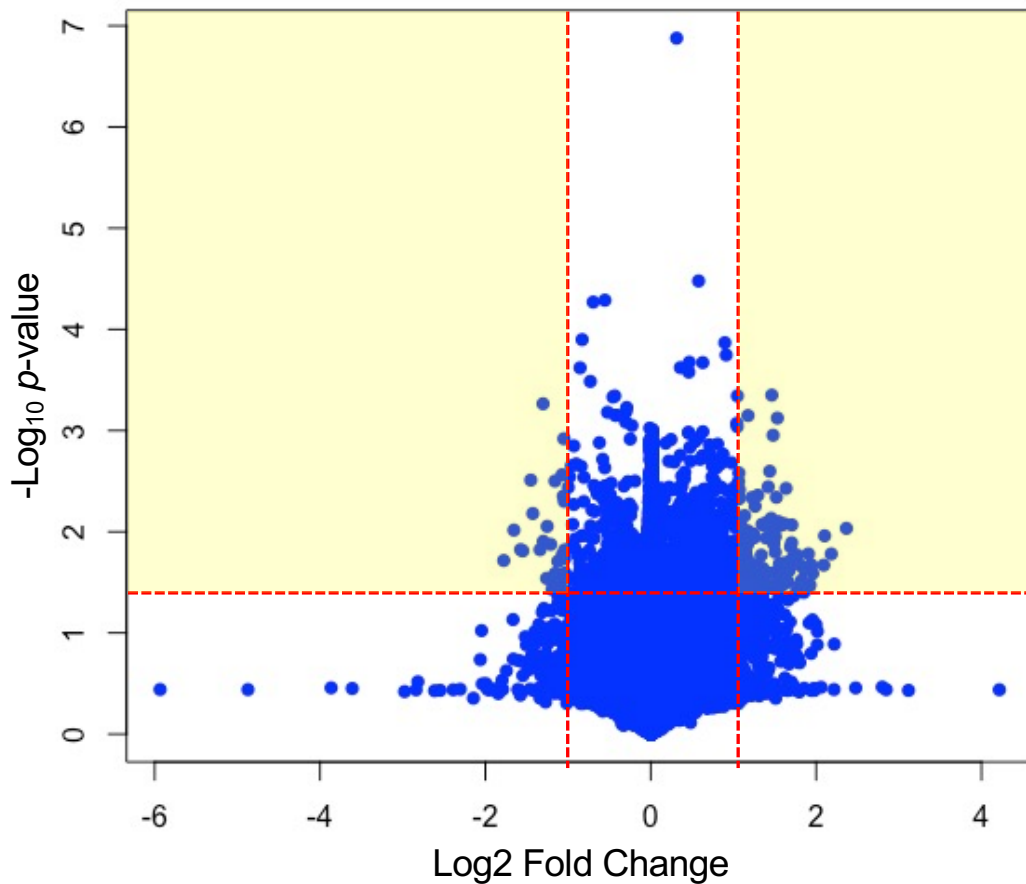

DEGs were selected with thresholds of  $|\log_2 \text{Fold change}| \geq 1$  and  $P < 0.05$ . Statistical analysis was performed using the Student's t-test.

# Supplementary Figure S3

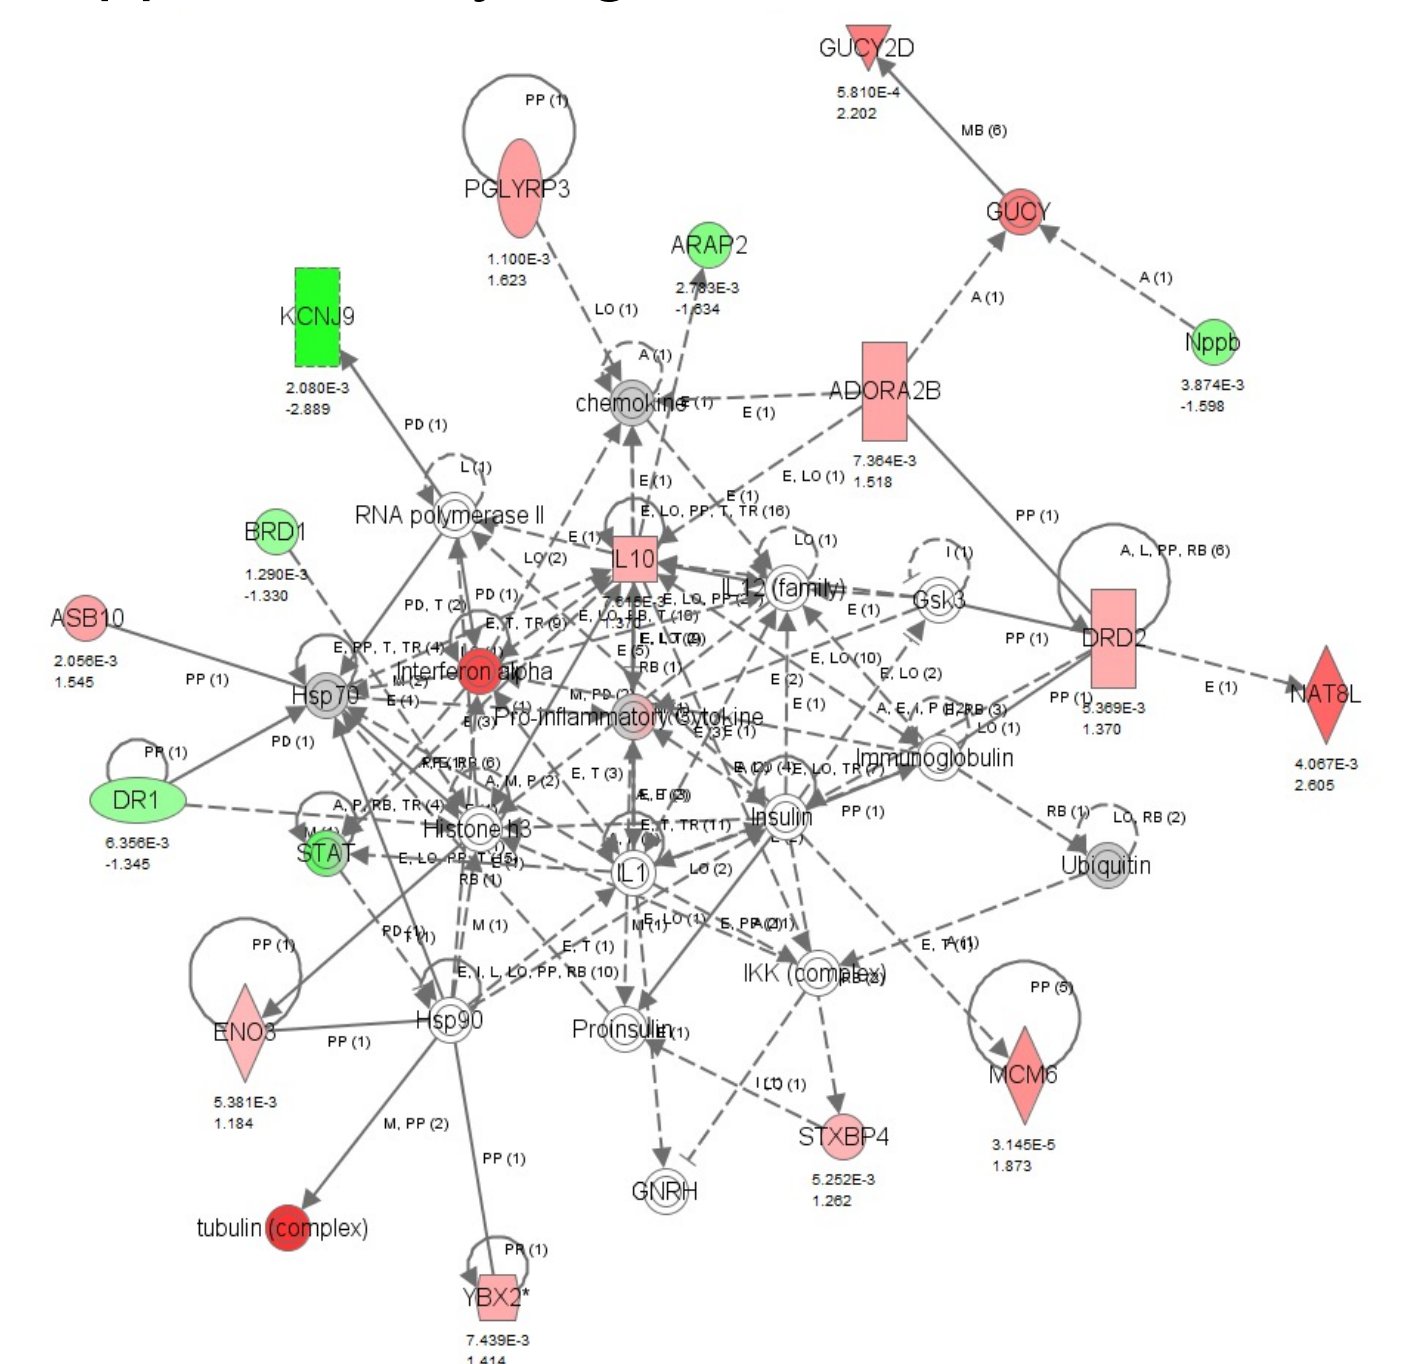

Supplement: s1 [file s1]
